# Supplementary material
Source: PubMed Central journal article supplement (PMC2668020)
Supplement: mmc1.pdf [file mmc1.pdf]

**Supplemental Data**

**Mutations in *STIL*, Encoding a Pericentriolar  
and Centrosomal Protein, Cause Primary Microcephaly**

Arun Kumar, Satish C. Girimaji, Mahesh R. Duvvari, and Susan H. Blanton

**Figure S1. Haplotype analysis of families IIS-17 and IIS-28.** The regions of homozygosity in affected individuals are boxed. The disease haplotype is boxed in normal individuals. D1S2134, which showed homozygosity in all affected individuals (V-1, V-2 and V-3) and heterozygosity in both parents (III-1 and IV-1) from family IIS-17 during a genome-wide screen, is marked in bold.

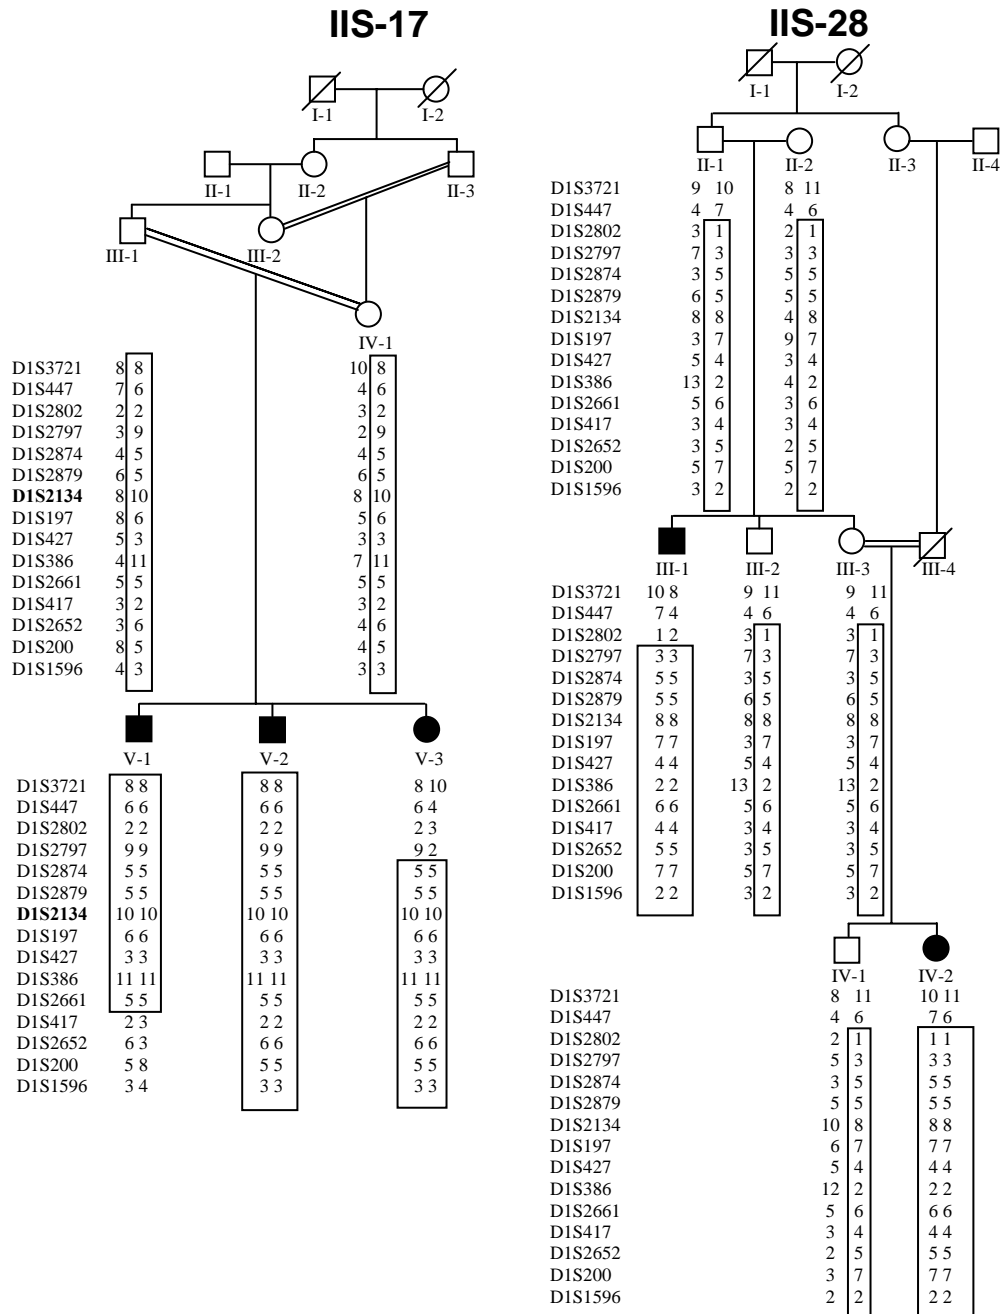

**Figure S2. Haplotype analysis of families IIS-3, IIS-35 and IIS-40.** The regions of homozygosity in affected individuals are boxed. The disease haplotype is boxed in normal individuals.

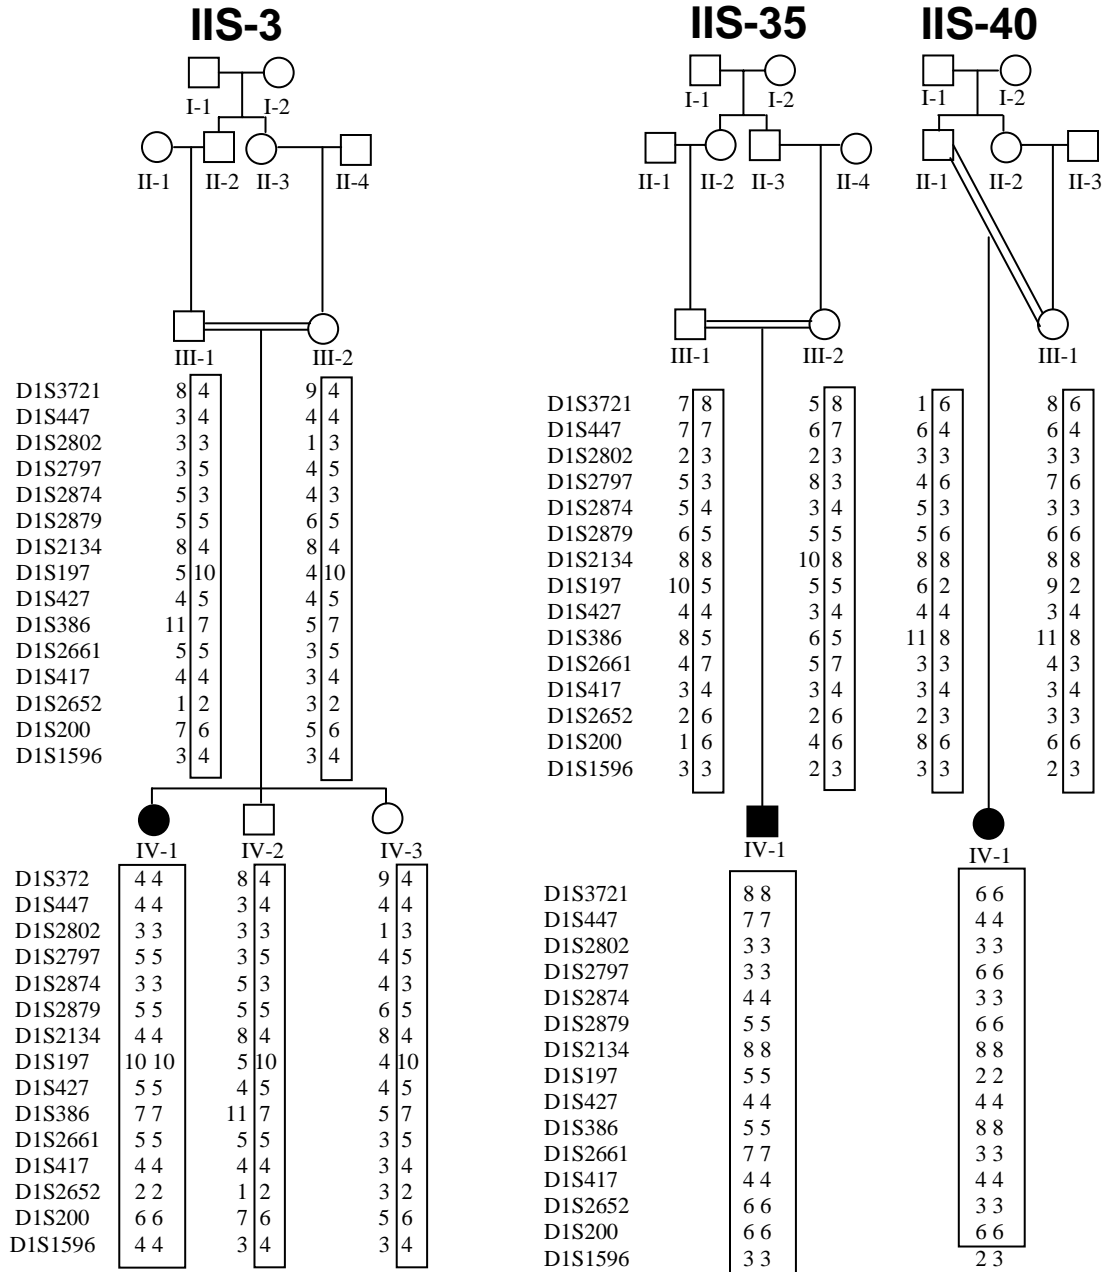

**Figure S3. Combined multi-point analysis of five MCPH7 families.** A maximum combined multi-point LOD score of 6.97 is obtained for the region flanked by D1S2797 and D1S417.

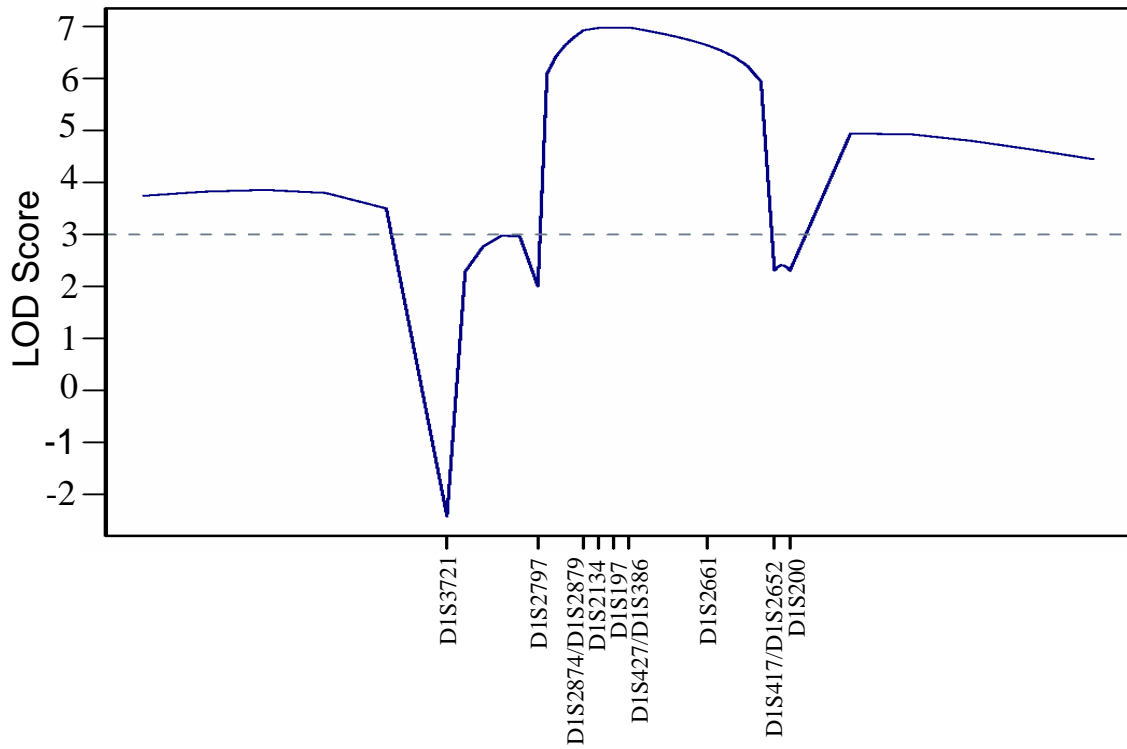



**Figure S5. Genotyping of families IIS-28 and IIS-45 with markers flanking the *STIL* gene.** The disease haplotypes (boxed) are different in both families, suggesting that the mutation c.3655delG has independent origins in these families.

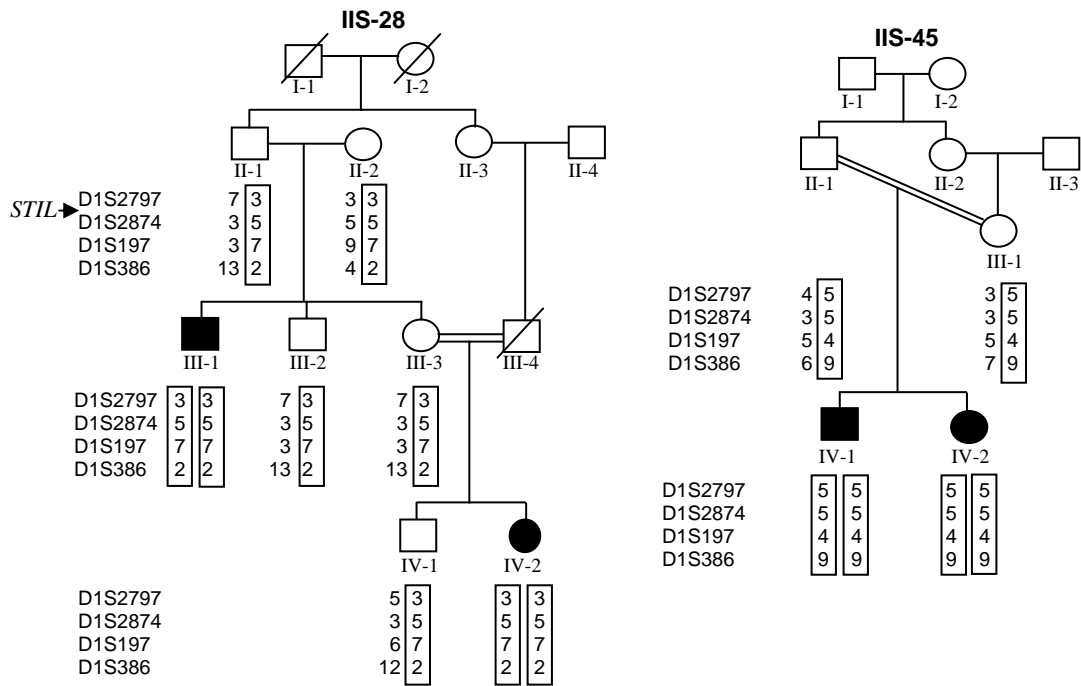

**Figure S6. RT-PCR analysis of the *STIL* gene expression in different human fetal tissues.** The *STIL* gene was amplified by the following primers: forward, 5'-cttaagcaactaagaagccttgag-3', and reverse, 5'-gcctccatgctcaaatccacacca-3'. *GAPDH* expression was used as a control. RNA from tissues was isolated using the Tri REAGENT™ (Sigma-Aldrich, USA). The 1st-strand cDNA template from RNA samples was synthesized using the Revertaid™ H Minus First Strand cDNA Synthesis kit (Fermentas, USA). Fetal tissue samples were collected at the Kempegowda Institute of Medical Sciences, Bangalore following approval from the Institute's ethical committee and with the consent of the mother. *STIL* is clearly ubiquitously expressed.

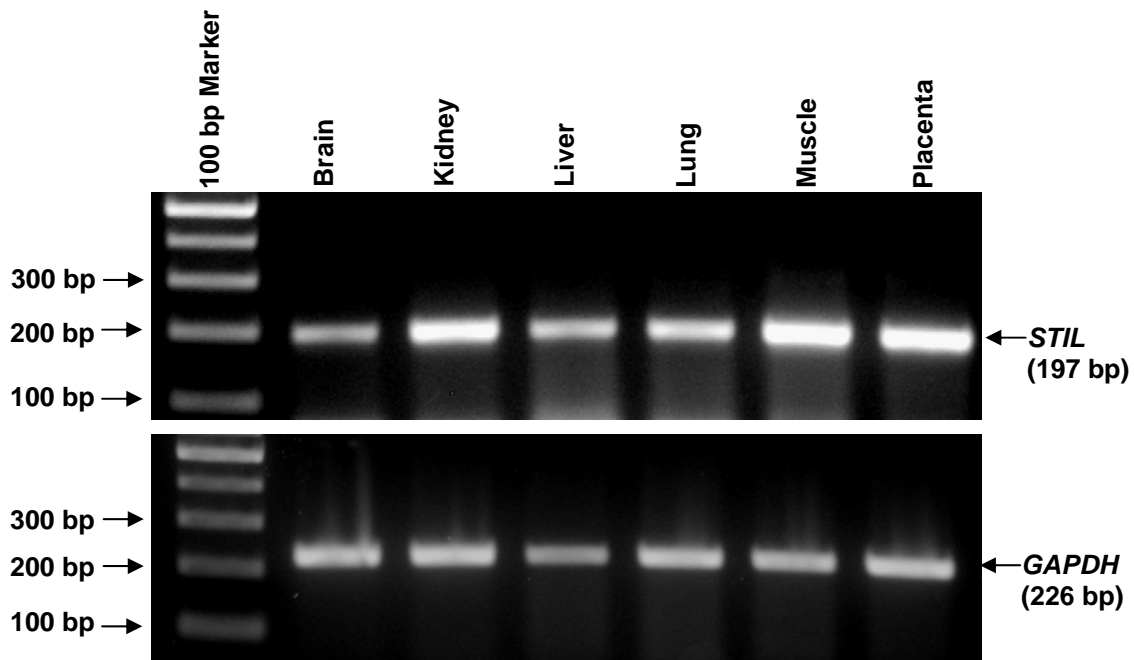

**Table S1.** Microsatellite markers from the MCPH7 candidate region.

| Sl.# | Marker <sup>a</sup> | Genetic distance (cM) <sup>b</sup> |
|------|---------------------|------------------------------------|
| 1    | D1S3721             | 72.59                              |
| 2    | D1S447              | 73.81                              |
| 3    | D1S2802             | 75.66                              |
| 4    | D1S2797             | 75.66                              |
| 5    | D1S2874             | 75.66                              |
| 6    | D1S2879             | 75.66                              |
| 7    | D1S2134             | 75.66                              |
| 8    | D1S197              | 76.27                              |
| 9    | D1S427              | 76.27                              |
| 10   | D1S386              | 77.18                              |
| 11   | D1S2661             | 78.25                              |
| 12   | D1S417              | 79.80                              |
| 13   | D1S2652             | 80.77                              |
| 14   | D1S200              | 82.41                              |
| 15   | D1S1596             | 89.49                              |

<sup>a</sup> The order of markers is according to the UCSC Genome Bioinformatics site. Markers were either purchased from Research Genetics (USA) or synthesized by Sigma-Aldrich (India). Genotyping was carried out as described in Kumar et al.<sup>3</sup>. Total genomic DNA from blood samples was isolated using a Wizard<sup>TM</sup> Genomic DNA Purification kit (Promega, USA).

<sup>b</sup> Genetic distances were obtained from the Marshfield Medical Research Foundation web site for linkage maps.



**Table S2.** PCR primers used for mutation analysis of the *STIL*\* gene.

| Exon | Primer sequence (5'→3')                                      | T <sub>m</sub> | Amplicon size (bp) |
|------|--------------------------------------------------------------|----------------|--------------------|
| 3    | F:ttggcagaatgactctaactgatga<br>R:tacctccaagttatgtgaaaagc     | 58             | 329                |
| 4    | F:cctaccaaatgtctaccaagtttgc<br>R:aaatthtgcctgaggggagattcta   | 65             | 311                |
| 5    | F:ccctgcctttgaccctgggatttc<br>R:ggattacaggcgtgagcactggtc     | 65             | 304                |
| 6    | F:gctataatgtagtcttgcttggtga<br>R:ctaaacatagttgattcttggtga    | 58             | 324                |
| 7    | F:acttggcgatagggcacattca<br>R:ggacaattcttcacattacatggac      | 65             | 390                |
| 8    | F:gtgtgcaagacaacgttcattgaa<br>R:cctgacaaccacttatctttgtgg     | 58             | 338                |
| 9    | F:gtaggctgataaaagccatacgtc<br>R:taaactatgaatggggaaaggatc     | 58             | 253                |
| 10   | F:catgaagttatttgagtgcacatg<br>R:gttgggtttaaactgccaagtgc      | 65             | 289                |
| 11   | F:ccatcatctagtgttcagagctac<br>R:cttctagtgaatatgaaggaatgca    | 58             | 370                |
| 12   | F:ggtagtttattaaggctggctgg<br>R:gtgtttaaccatgaagagacttagg     | 58             | 385                |
| 13   | aF:ggctgaggaagtaagtatacag<br>aR:gagatggccattatgagaagatg      | 58             | 418                |
| 13   | bF:actgcaaagtaagacagccactgc<br>bR:tcagactggacatctgaatggatc   | 58             | 401                |
| 13   | cF:catagtcatattcaatagtcgcta<br>cR:tgaggagagggtccagttttaaga   | 58             | 465                |
| 14   | F:gthttgttgattactccctgtcag<br>R:ctactgcacatgcaccaattgaa      | 65             | 317                |
| 15   | F:attcttaacaaaggttggcagagta<br>R:ctgtaaacatgcatctaacattgtg   | 58             | 424                |
| 16   | F:atacaaccaggtgctgcttgagtc<br>R:cctaaggctcaatcagtttaaccta    | 58             | 420                |
| 17   | F:gaaccaccacaccagccctaac<br>R:ttctgatgagattgccacaatacatc     | 58             | 443                |
| 18   | aF:ggaacacattgagaactatgtattac<br>aR:attcactctgctatctgcattgtc | 58             | 443                |
| 18   | bF:tatggactctacaagcagtgaca<br>bR:taagtatctcaggagacaccctg     | 58             | 545                |

Abbreviations: F, forward primer; R, reverse primer; bp, base pairs; and T<sub>m</sub>, annealing temperature.

\*For mutation analysis of this gene (GenBank accession no. NM\_003035), entire coding exons and intron-exon junctions were amplified and sequenced on an ABIprism A370-automated sequencer.

**Table S3.** PCR primers used for mutation analysis in normal controls by single-stranded conformation polymorphism analysis (SSCP).

| <b>Mutation</b>             | <b>Primer sequence (5'→3')</b>                                  | <b>T<sub>m</sub><br/>(°C)</b> | <b>Amplicon size<br/>(bp)</b> |
|-----------------------------|-----------------------------------------------------------------|-------------------------------|-------------------------------|
| c.3715C>T and<br>c.3655delG | F: tgcagacaaaagcaaacagcagttg<br>R: tgcttagcgttcagaagggtgca      | 61                            | 184                           |
| c.IVS16+1G>A                | F: atcagaggaaccaaaaattgagcatg<br>R: ctgtaaacaatgcatctaaacattgtg | 58                            | 184                           |

**Table S4.** Clinical details of patients with mutations in the *STIL* gene.

| Family/patient | Mutation     | Age (years) | HC (SD) <sup>a</sup> | Development milestone                                          | Degree of mental retardation <sup>b</sup> | Motor and neurological symptoms |
|----------------|--------------|-------------|----------------------|----------------------------------------------------------------|-------------------------------------------|---------------------------------|
| IIS-3/ IV-1    | c.IVS16+1G>A | 19          | 47.0 (5)             | All development milestones delayed                             | MILMR                                     | None                            |
| IIS-17/ V-1    | c.3715C>T    | 11.5        | 43.0 (7)             | Independent walking at 2 years, meaningful speech at 5 years   | MODMR                                     | None                            |
| IIS-17/ V-2    | c.3715C>T    | 5           | 39.3 (8)             | Independent walking at 1.5 years, meaningful speech at 2 years | MILMR                                     | None                            |
| IIS-17/ V-3    | c.3715C>T    | 9           | 41.5 (8)             | Independent walking at 1.5 years, meaningful speech at 4 years | MILMR                                     | None                            |
| IIS-28/ III-1  | c.3655delG   | 20          | 44 (7)               | All development milestones delayed                             | MILMR                                     | None                            |
| IIS-28/ IV-2   | c.3655delG   | 8           | 38.5 (10)            | Independent walking at 1 year, meaningful speech at 4 years    | SMR                                       | None                            |
| IIS-45/ IV-1   | c.3655delG   | 23          | 49.0 (4)             | Independent walking at 3 years, meaningful speech at 4 years   | SMR                                       | None                            |
| IIS-45/ IV-2   | c.3655delG   | 14          | 42.5 (8)             | Independent walking at 3 years,                                | SMR                                       | None                            |

|  |  |  |  |                                    |  |  |
|--|--|--|--|------------------------------------|--|--|
|  |  |  |  | meaningful<br>speech at 4<br>years |  |  |
|--|--|--|--|------------------------------------|--|--|

<sup>a</sup> Head circumference in cm with SD below mean for age and sex in parentheses.

<sup>b</sup> MODMR, moderate mental retardation; MILMR, mild mental retardation; and, SMR, severe mental retardation.
